# Supplementary material
Source: publisher site journal article supplement (https://www.dovepress.com/article/564230)
Supplement: Supplementary file 1 [file Supplementary%20material.docx]

**
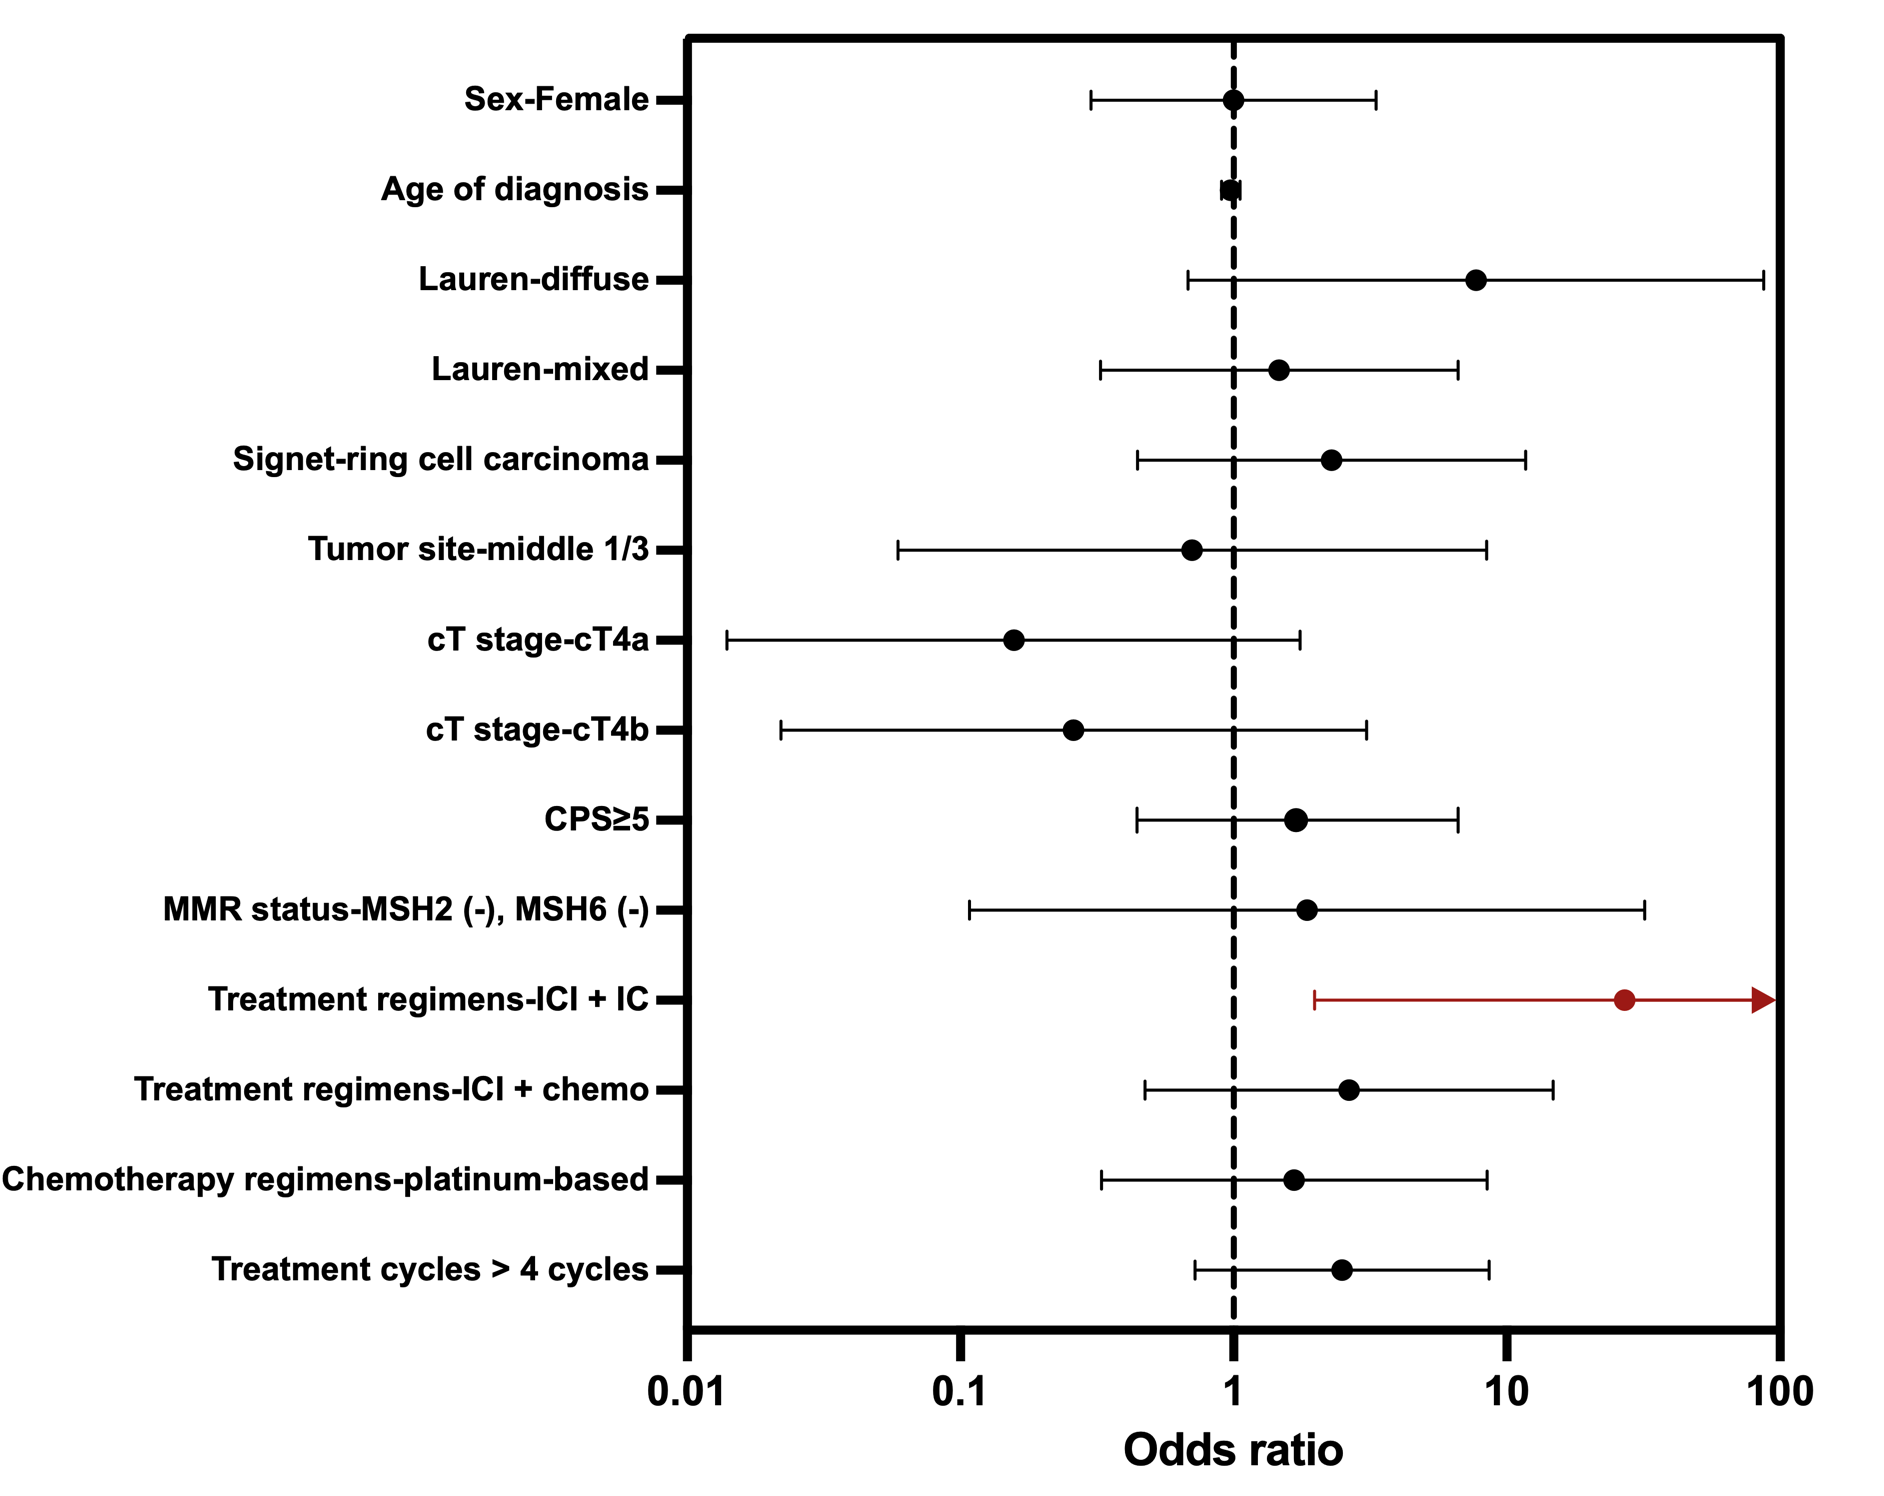
**

**Supplementary Figure 1. Forest plot showing factors associated with pathological complete response in univariate analysis.** CPS: combined positive score; MMR, mismatch repair; ICI, immune checkpoint inhibitor; IC, induction chemotherapy; chemo, chemotherapy

**
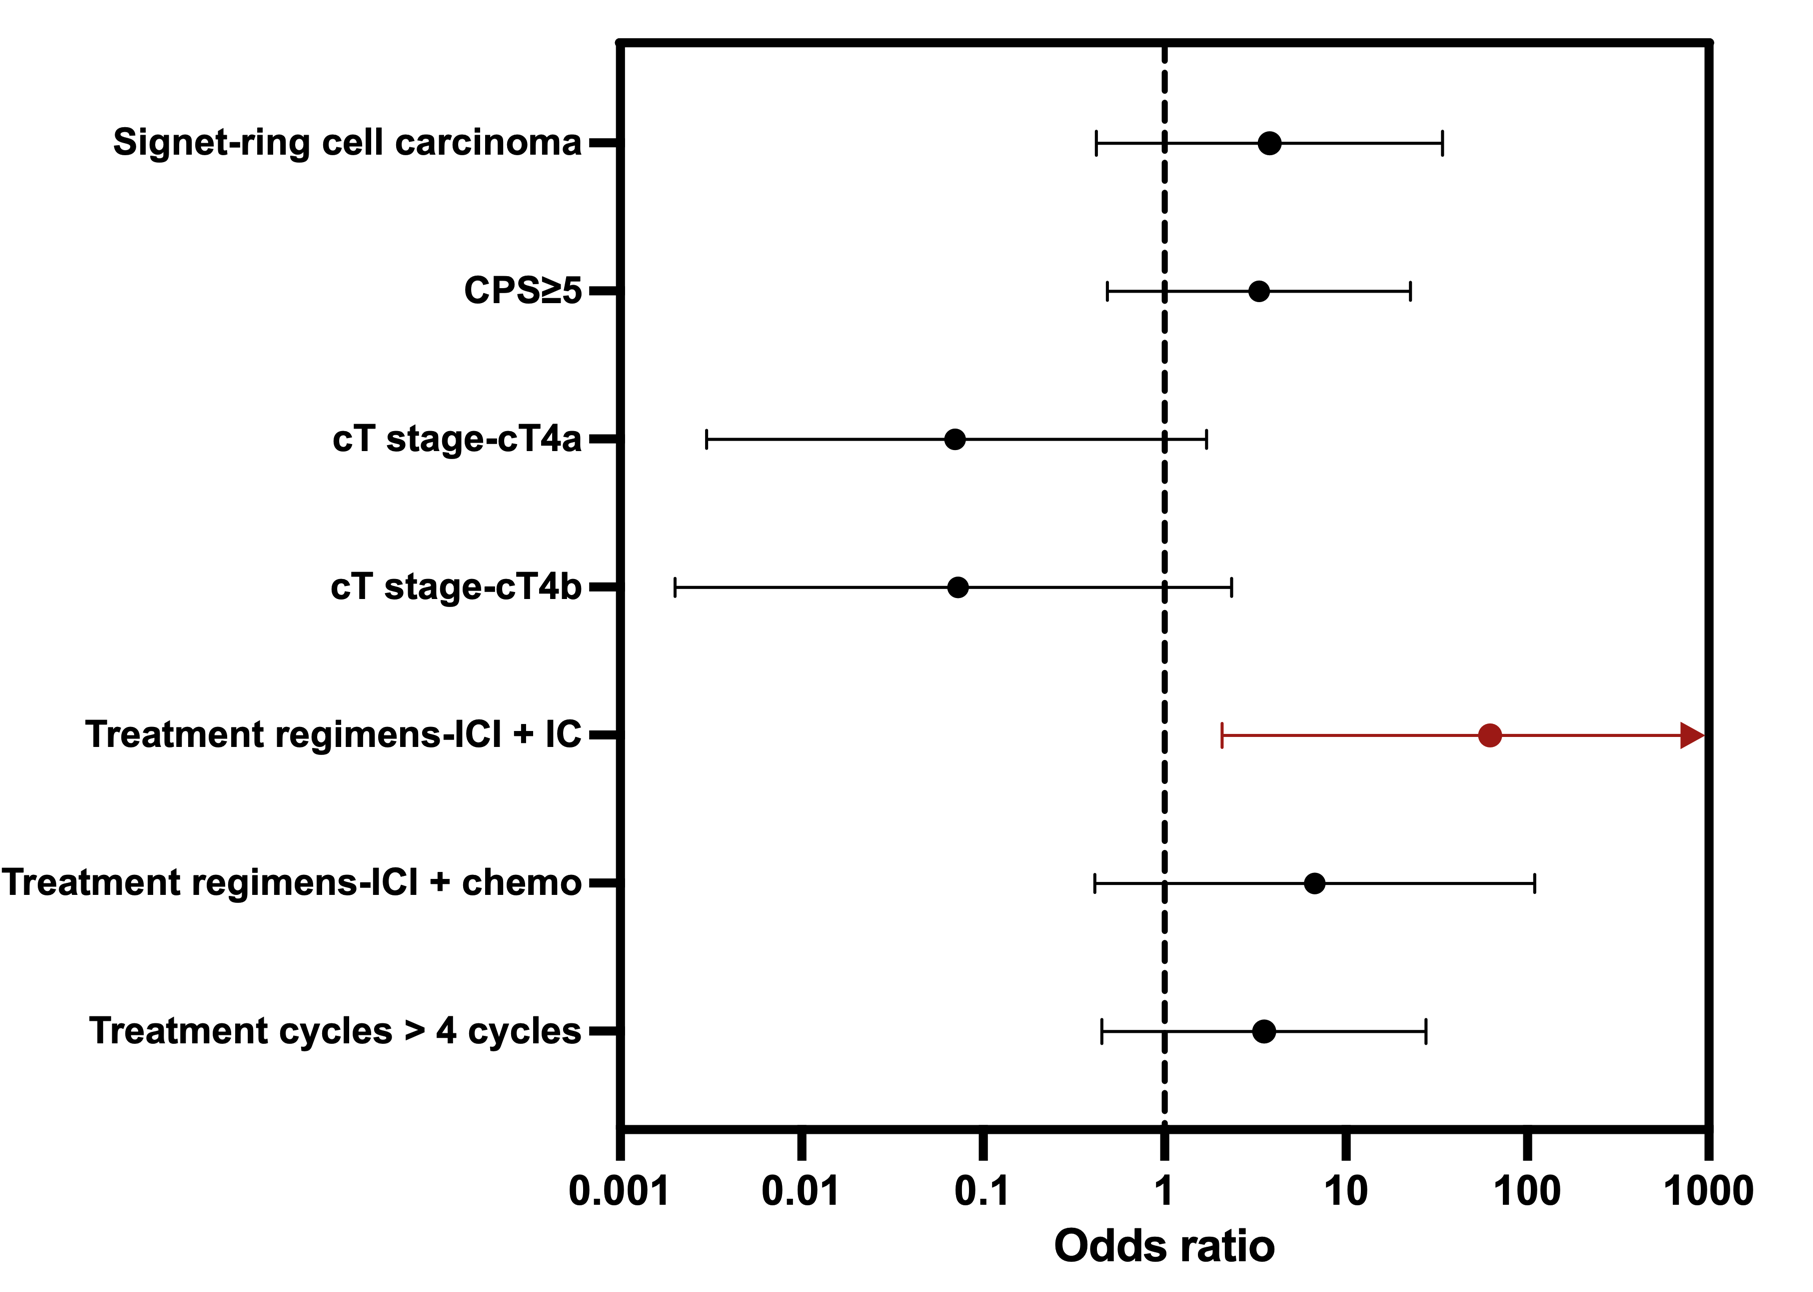
**

**Supplementary Figure 2. Forest plot showing factors associated with pathological complete response in multivariate analysis.** CPS: combined positive score; ICI, immune checkpoint inhibitor; IC, induction chemotherapy; chemo, chemotherapy

**
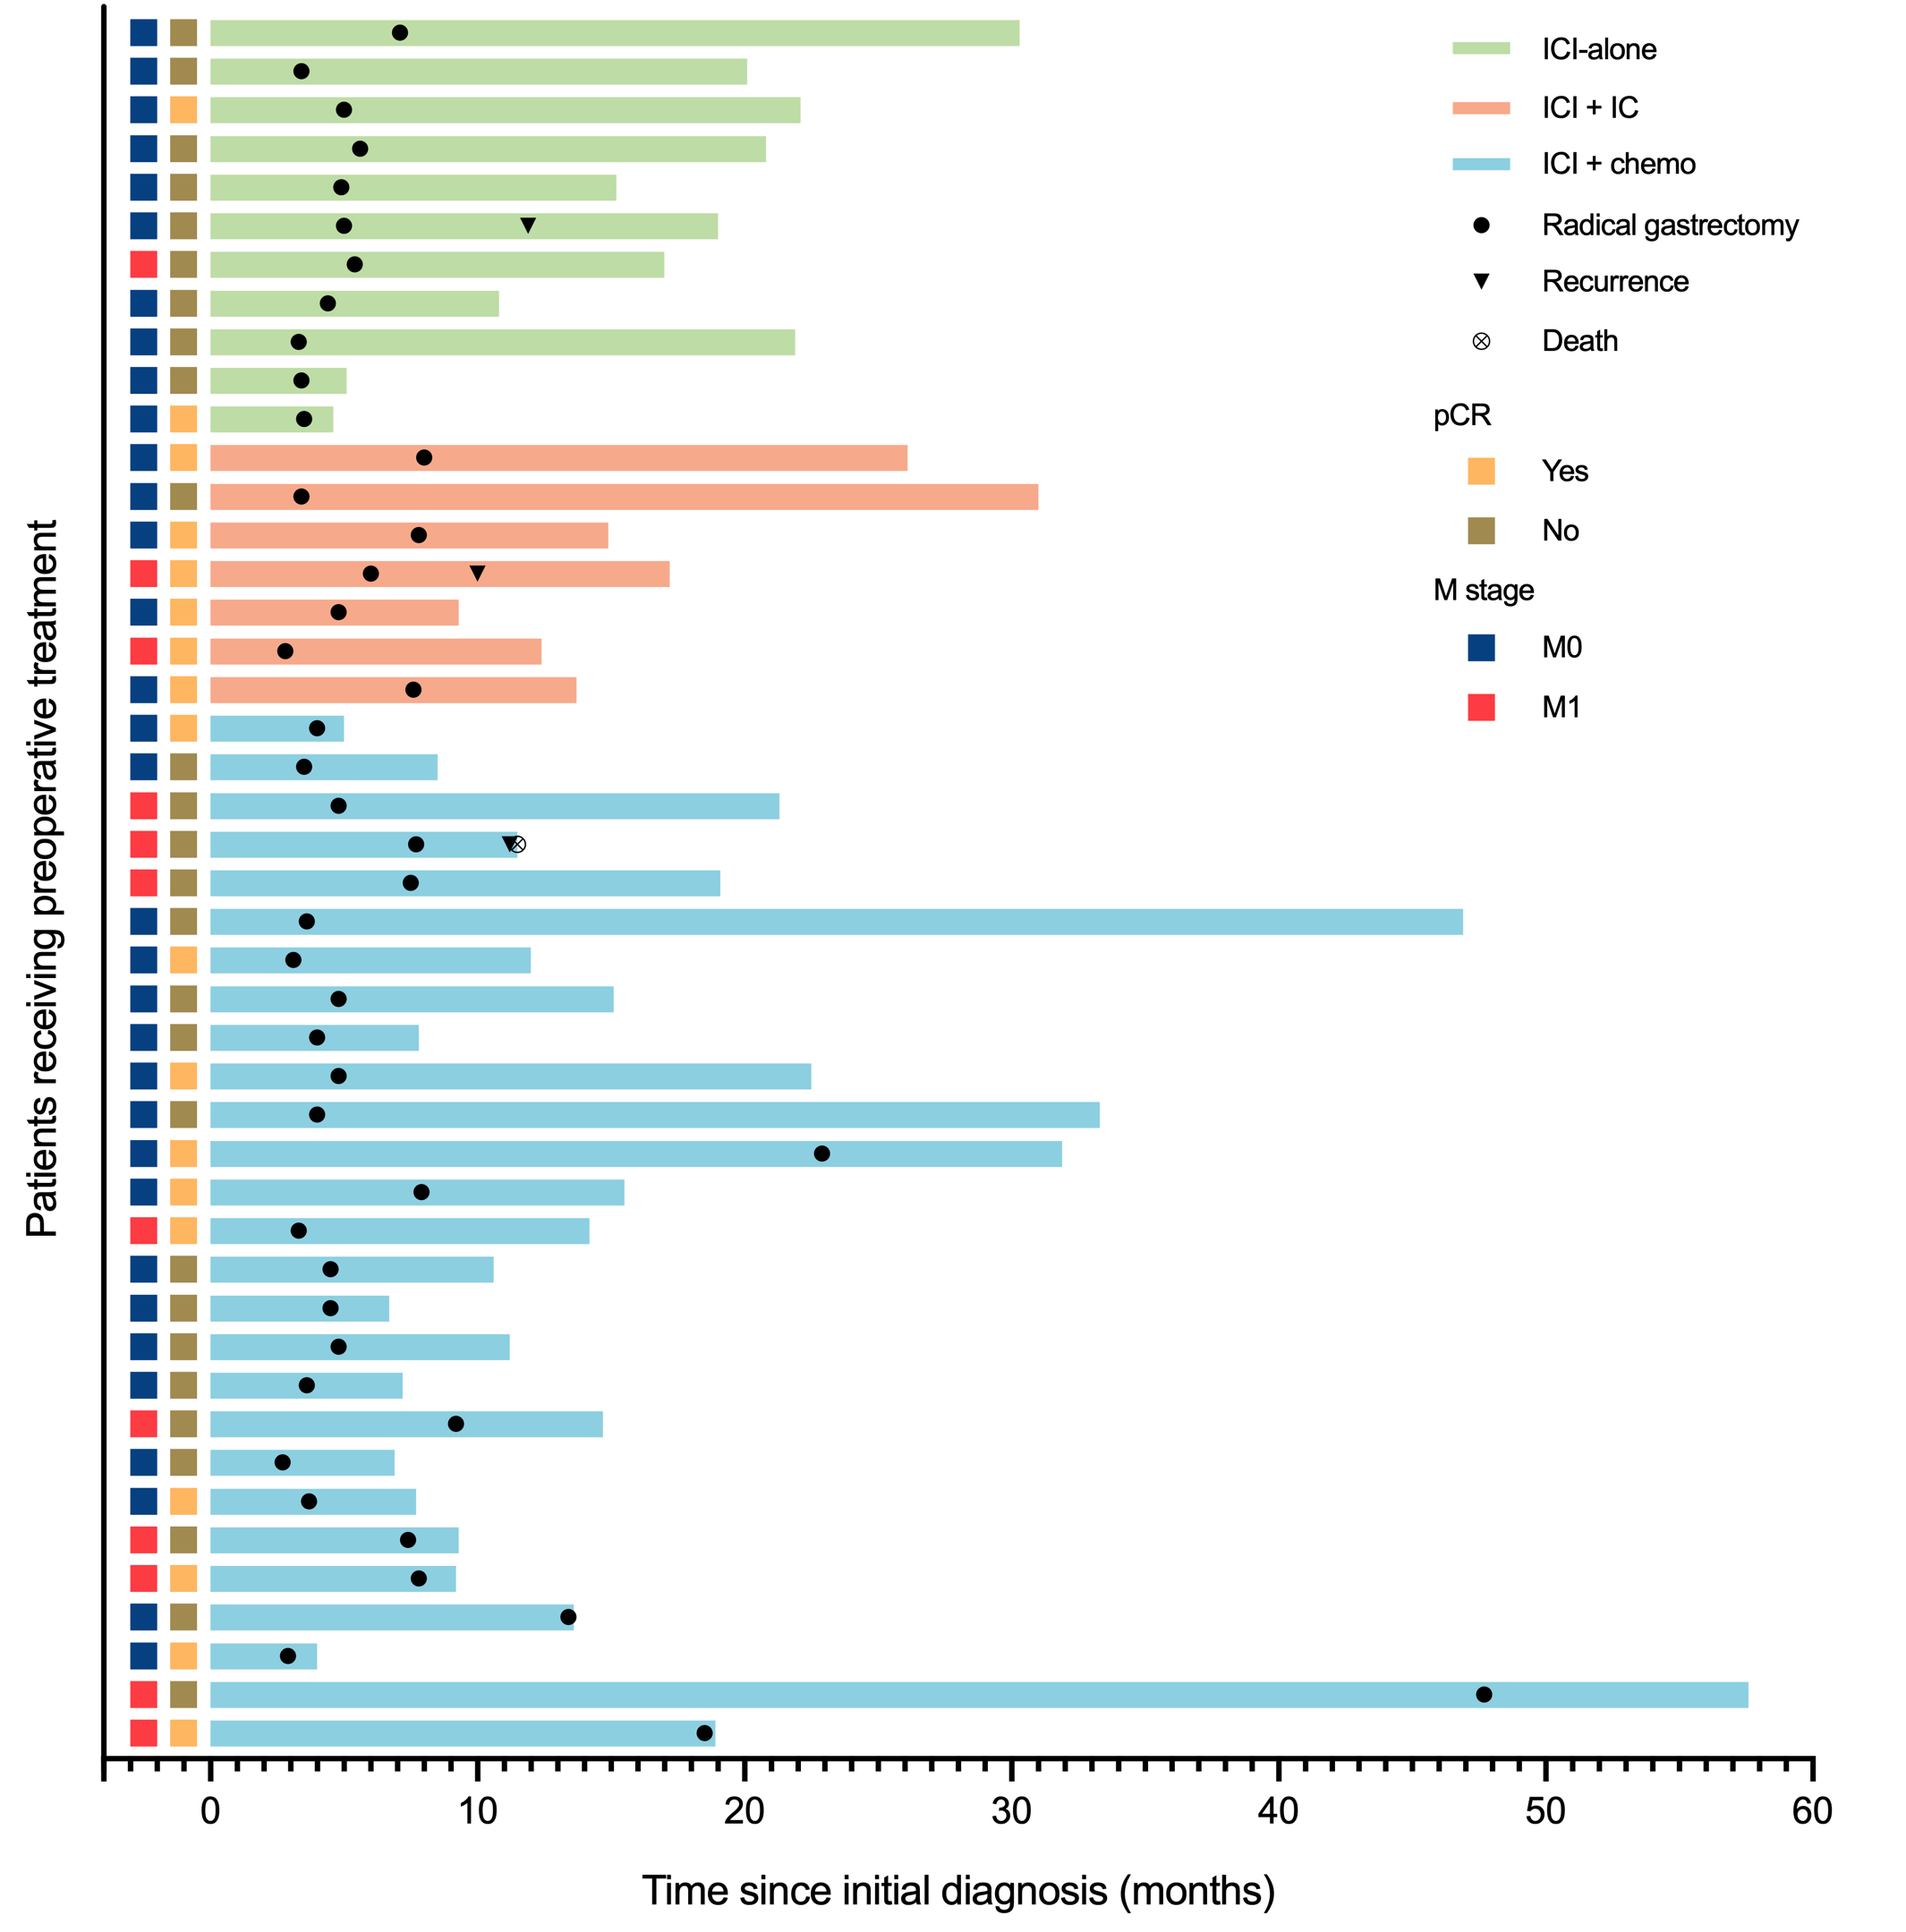
**

**Supplementary Figure 3. Swimming plot showing events during treatment and follow-up.** ICI, immune checkpoint inhibitor; IC, induction chemotherapy; chemo, chemotherapy; pCR, pathological complete response

**Supplementary Table 1. Preoperative treatment regimens and treatment cycles of patients**

|  | **ICI-alone**  **(*n*=11)** | **ICI + IC**  **(*n*=7)** | **ICI + chemo**  **(*n*=27)** |
| --- | --- | --- | --- |
| **Induction regimens** | | | |
| S-1 |  | 1 (14.3) |  |
| SOX | 2 (28.6) |
| S-1 + anti-PD-1 monotherapy | 1 (14.3) |
| SOX + anti-PD-1 monotherapy | 3 (42.8) |
| **ICI regimens** | | | |
| Anti-PD-1 monotherapy | 9 (81.8) | 7 (100.0) | 26 (96.3) |
| Anti-PD-L1 monotherapy | 1 (9.1) | 0 | 0 |
| Anti-PD-1 and anti-CTLA-4 | 1 (9.1) | 0 | 1 (3.7) |
| **Chemotherapy regimens** |  |  |  |
| Non-platinum |  | 2 (28.6) | 6 (22.2) |
| Platinum-based | 5 (71.4) | 21 (77.8) |
| **Treatment cycles in total** | | | |
| ≤ 4 cycles | 4 (36.4) | 2 (28.6) | 15 (55.6) |
| > 4 cycles | 7 (63.6) | 5 (71.4) | 12 (44.4) |

ICI, immune checkpoint inhibitor; SOX, oxaliplatin plus S-1; PD-1, programmed cell death protein-1; PD-L1, programmed cell death ligand 1; CTLA-4, cytotoxic T lymphocyte-associated antigen-4

**Supplementary Table 2. Univariate analysis: factors associated with pathological complete response.**

|  | **non-pCR**  **(*n*=27)** | **pCR**  **(*n*=18)** | ***p* valuea** | **OR** | **95% CI** | ***P* valuea** |
| --- | --- | --- | --- | --- | --- | --- |
| **Sex (%)** |  |  | 1.000 |  |  |  |
| Male | 12 (44.4) | 8 (44.4) |  | Ref |  |  |
| Female | 15 (55.6) | 10 (55.6) |  | 1.000 | 0.301-3.321 | 1.000 |
| **Age of diagnosis [IQR, yr]** | 68.0 [62.0, 71.0] | 65.0 [61.0, 71.0] | 0.318 | 0.977 | 0.902-1.058 | 0.571 |
| **Lauren classification (%)** |  |  | 0.191 |  |  |  |
| Intestinal | 18 (66.7) | 7 (38.9) |  | Ref |  |  |
| Diffuse | 1 (3.7) | 3 (16.7) |  | 7.714 | 0.682-87.252 | 0.099 |
| Mixed | 7 (25.9) | 4 (22.2) |  | 1.469 | 0.326-6.632 | 0.617 |
| Unavailableb | 1 (3.7) | 4 (22.2) |  | NA |  |  |
| **Signet-ring cell carcinoma (%)** |  |  | 0.412 |  |  |  |
| No | 24 (88.9) | 14 (77.8) |  | Ref |  |  |
| Yes | 3 (11.1) | 4 (22.2) |  | 2.286 | 0.445-11.732 | 0.322 |
| **Tumor site (%)** |  |  | 1.000 |  |  |  |
| Upper 1/3 | 1 (3.7) | 0 |  | NA |  |  |
| Middle 1/3 | 2 (7.4) | 1 (5.6) |  | 0.706 | 0.059-8.425 | 0.783 |
| Lower 1/3 | 24 (88.9) | 17 (94.4) |  | Ref |  |  |
| **cT stage (%)** |  |  | 0.291 |  |  |  |
| cT3 | 1 (3.7) | 3 (16.7) |  | Ref |  |  |
| cT4a | 17 (63.0) | 8 (44.4) |  | 0.157 | 0.014-1.754 | 0.133 |
| cT4b | 9 (33.3) | 7 (38.9) |  | 0.259 | 0.022-3.063 | 0.284 |
| **cM stage (%)** |  |  | 1.000 |  |  |  |
| M0 | 20 (74.1) | 13 (72.2) |  | Ref |  |  |
| M1 | 7 (25.9) | 5 (27.8) |  | 1.099 | 0.287-4.211 | 0.891 |
| **Metastasis site (%)** |  |  | 1.000 |  |  |  |
| Retroperitoneal lymph nodes | 3 (42.9) | 2 (40.0) |  | Ref |  |  |
| Peritoneal cavity | 1 (14.2) | 1 (20.0) |  | 1.500 | 0.055-40.633 | 0.810 |
| Distant organs | 3 (42.9) | 2 (40.0) |  | 1.000 | 0.080-12.557 | 1.000 |
| **CPS≥5 (%)** |  |  | 0.517 |  |  |  |
| No | 11 (40.7) | 5 (27.8) |  | Ref |  |  |
| Yes | 13 (48.2) | 10 (55.6) |  | 1.692 | 0.443-6.647 | 0.442 |
| Unavailableb | 3 (11.1) | 3 (16.6) |  | NA |  |  |
| **MMR status (%)** |  |  | 0.460 |  |  |  |
| MLH1 (-), PMS2 (-) | 26 (96.3) | 14 (77.7) |  | Ref |  |  |
| MSH2 (-), MSH6 (-) | 1 (3.7) | 1 (5.6) |  | 1.857 | 0.108-32.008 | 0.670 |
| PMS2 (-) | 0 | 1 (5.6) |  | NA |  |  |
| MSH6 (-) | 0 | 0 |  | NA |  |  |
| Uncleara, b | 0 | 2 (11.1) |  | NA |  |  |
| **Treatment regimens** |  |  | **0.015** |  |  |  |
| ICI-alone | 9 (33.3) | 2 (11.1) |  | Ref |  |  |
| ICI + IC | 1 (3.7) | 6 (33.3) |  | 27.000 | 1.979-368.383 | **0.013** |
| ICI + chemo | 17 (63.0) | 10 (55.6) |  | 2.647 | 0.474-14.779 | 0.267 |
| **Chemotherapy regimensc** |  |  | 0.693 |  |  |  |
| Non-platinum | 5 (27.8) | 3 (18.8) |  | Ref |  |  |
| Platinum-based | 13 (72.2) | 13 (81.2) |  | 1.667 | 0.328-8.462 | 0.538 |
| **Treatment cycles in total** |  |  | 0.223 |  |  |  |
| ≤ 4 cycles | 15 (55.6) | 6 (33.3) |  | Ref |  |  |
| > 4 cycles | 12 (44.4) | 12 (66.7) |  | 2.500 | 0.724-8.635 | 0.147 |

pCR, pathological complete response; OR, odds ratio; CI, confidence interval; Ref, reference; IQR, interquartile range; yr, year; NA, unavailable; CPS: combined positive score; MMR, mismatch repair; ICI, immune checkpoint inhibitor; IC, induction chemotherapy; chemo, chemotherapy

a Significant P-value was indicated in bold.

b Unclear or unavailable data were not included in analysis.

c Patients who did not receive chemotherapy (the ICI-alone cohort) were not included in analysis.

**Supplementary Table 3. Multivariate analysis: factors associated with pathological complete response.**

|  | **OR** | **95% CI** | ***P* valuea** |
| --- | --- | --- | --- |
| **Signet-ring cell carcinoma (%)** |  |  |  |
| No | Ref |  |  |
| Yes | 3.794 | 0.422-34.150 | 0.234 |
| **CPS≥5 (%)** |  |  |  |
| No | Ref |  |  |
| Yes | 3.315 | 0.485-22.664 | 0.222 |
| **cT stage (%)** |  |  |  |
| cT3 | Ref |  |  |
| cT4a | 0.070 | 0.003-1.710 | 0.103 |
| cT4b | 0.073 | 0.002-2.349 | 0.140 |
| **cM stage (%)** |  |  |  |
| M0 | Ref |  |  |
| M1 | 0.492 | 0.051-4.753 | 0.540 |
| **Treatment regimens** |  |  |  |
| ICI-alone | Ref |  |  |
| ICI + IC | 62.337 | 2.075-1872.409 | **0.017** |
| ICI + chemo | 6.739 | 0.413-109.915 | 0.180 |
| **Treatment cycles in total** |  |  |  |
| ≤ 4 cycles | Ref |  |  |
| > 4 cycles | 3.536 | 0.452-27.689 | 0.229 |

OR, odds ratio; CI, confidence interval; Ref, reference; CPS: combined positive score; ICI, immune checkpoint inhibitor; IC, induction chemotherapy; chemo, chemotherapy

a Significant P-value was indicated in bold.

**Supplementary Table 4. Association of baseline blood parameters and their variations with pCR**

|  | **Baseline** | | |  | **Variation** | | |
| --- | --- | --- | --- | --- | --- | --- | --- |
|  | **non-pCR**  **(*n*=22)** | **pCR**  **(*n*=13)** | **p value** |  | **non-pCR**  **(*n*=22)** | **pCR**  **(*n*=13)** | **p valuea** |
| **RBC count (*10^12/L)** | 3.77 [3.46, 4.24] | 4.19 [3.58, 4.41] | 0.591 |  | 0.04 [-0.32, 0.43] | -0.16 [-0.49, 0.28] | 0.665 |
| **Hemoglobin (g/L)** | 108 [87, 123] | 101 [90, 128] | 0.985 |  | 8 [0, 21] | 2 [-13, 17] | 0.348 |
| **WBC count (*10^9/L)** | 5.99 [4.94, 7.67] | 5.73 [5.33, 6.55] | 0.625 |  | -0.67 [-2.19, 0.20] | -1.37 [-2.30, -0.13] | 0.791 |
| **Neutrophil count (*10^9/L)** | 4.0 [3.2, 5.0] | 3.4 [3.0, 4.1] | 0.335 |  | -0.6 [-1.8, 0.3] | -1.0 [-1.6, 0.1] | 0.510 |
| **Lymphocyte count (*10^9/L)** | 1.6 [1.1, 1.9] | 1.6 [1.3, 2.1] | 0.726 |  | 0.0 [-0.5, 0.2] | -0.4 [-0.7, -0.2] | **0.023** |
| **Monocyte count (*10^9/L)** | 0.49 [0.38, 0.60] | 0.49 [0.41, 0.57] | 0.987 |  | -0.04 [-0.18, 0.10] | 0.01 [-0.08, 0.15] | 0.155 |
| **Platelet count (*10^9/L)** | 237 [208, 308] | 261 [194, 310] | 0.933 |  | -64 [-127, -36] | -60 [-121, -36] | 0.768 |
| **ALB (g/L)** | 40 [37, 41] | 39 [36, 40] | 0.702 |  | 2 [-1, 5] | 0 [-4, 4] | 0.254 |
| **LDH (U/L)** | 171 [132, 189] | 173 [134, 191] | 0.847 |  | 9 [-3, 46] | 13 [-20, 51] | 0.873 |
| **MLR** | 0.32 [0.22, 0.44] | 0.26 [0.24, 0.37] | 0.699 |  | 0.03 [-0.07, 0.10] | 0.13 [0.03, 0.25] | **0.014** |
| **NLR** | 2.5 [2.0, 3.9] | 2.2 [1.7, 2.7] | 0.335 |  | -0.1 [-1.3, 0.5] | 0.1 [-0.4, 0.5] | 0.208 |
| **PLR** | 159 [126, 243] | 146 [130, 195] | 0.724 |  | -34 [-73, -6] | 6 [-48, 16] | 0.073 |
| **SII** | 657 [486, 1076] | 540 [437, 661] | 0.271 |  | -195 [-555, -91] | -145 [-285, -5] | 0.287 |

pCR, pathological complete response; RBC, red blood cell; WBC, white blood cell; ALB, albumin; LDH, lactate dehydrogenase; MLR, monocyte-to-lymphocyte ratio; NLR, neutrophil-to-lymphocyte ratio; PLR, platelet-to-lymphocyte ratio; SII, systemic immune-inflammation index

a Significant P-values are indicated in bold.
